# Supplementary material
Source: PubMed Central journal article supplement (PMC1877878)

Figure S1

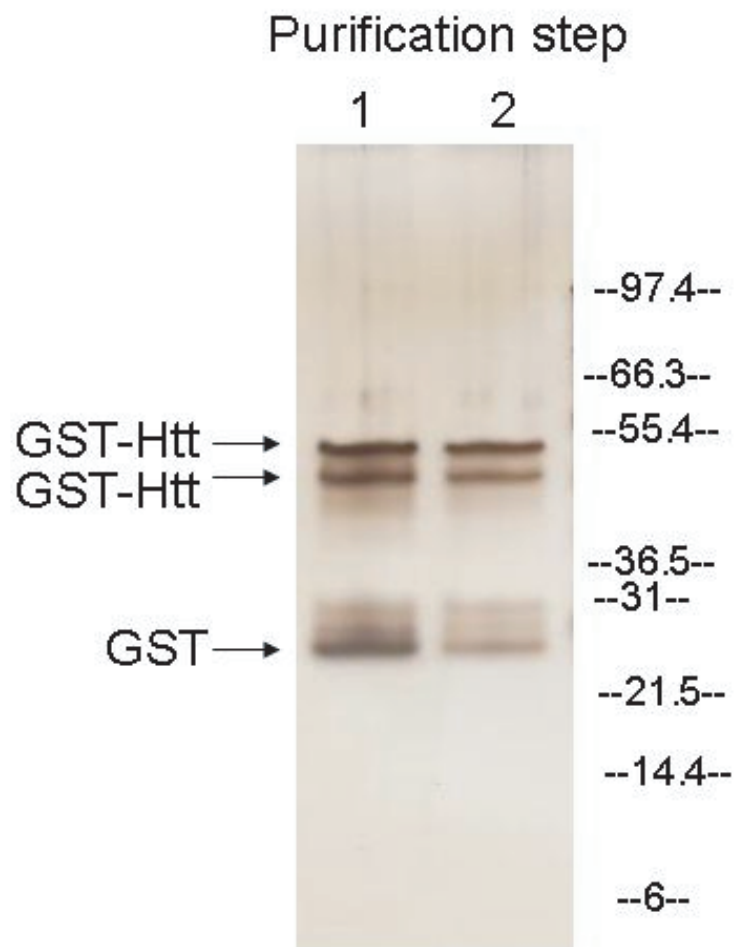

Supplement: pgen.0030082.sg001.pdf [file pgen.0030082.sg001.pdf]

Figure S2

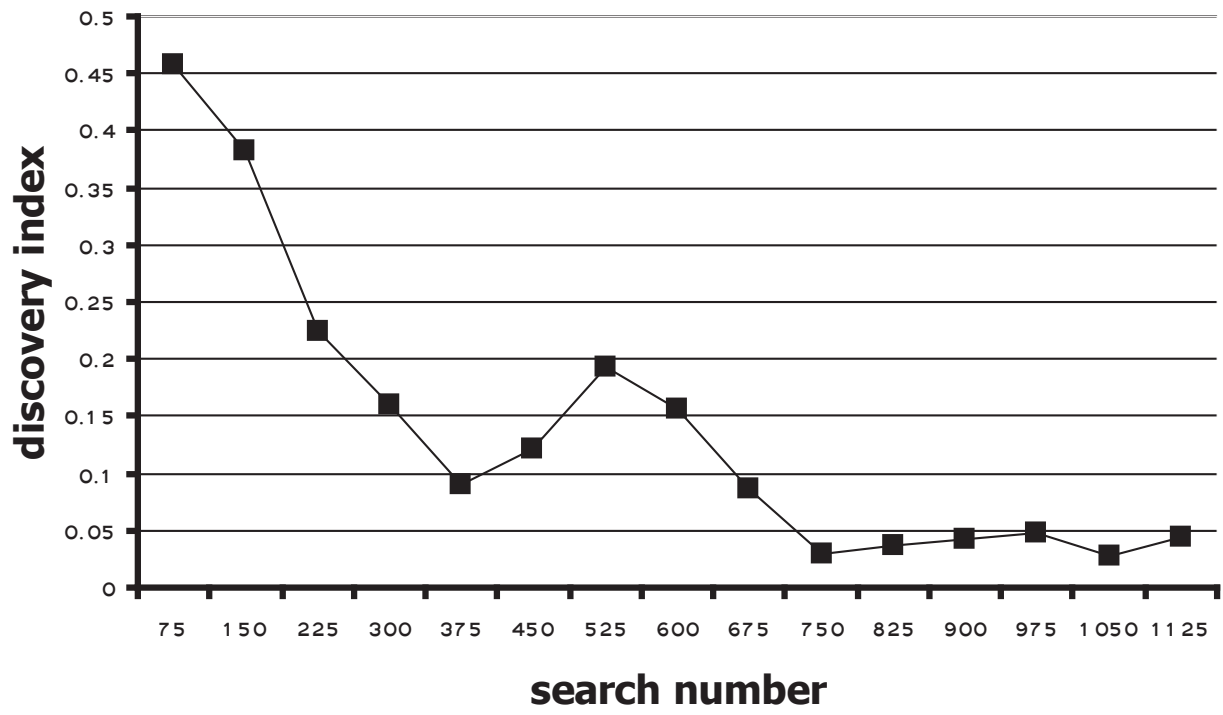

Supplement: pgen.0030082.sg002.pdf [file pgen.0030082.sg002.pdf]

Figure S3

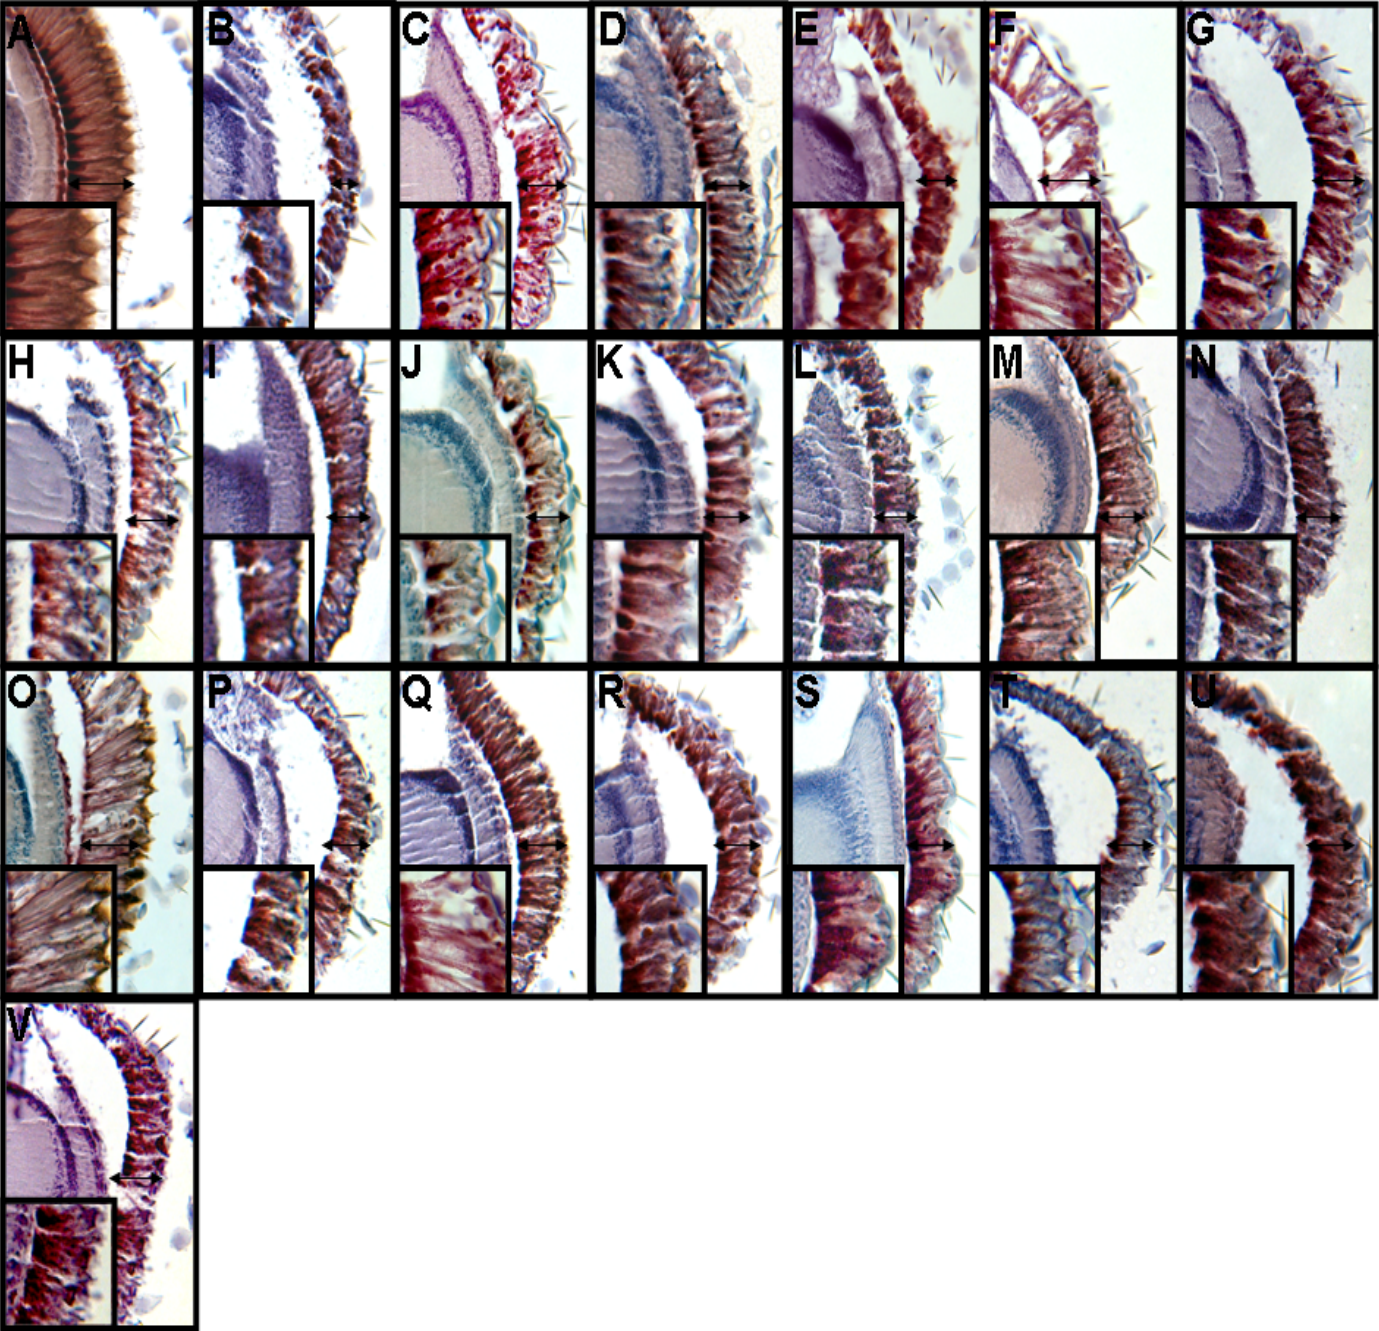

Supplement: pgen.0030082.sg003.pdf [file pgen.0030082.sg003.pdf]

Figure S4

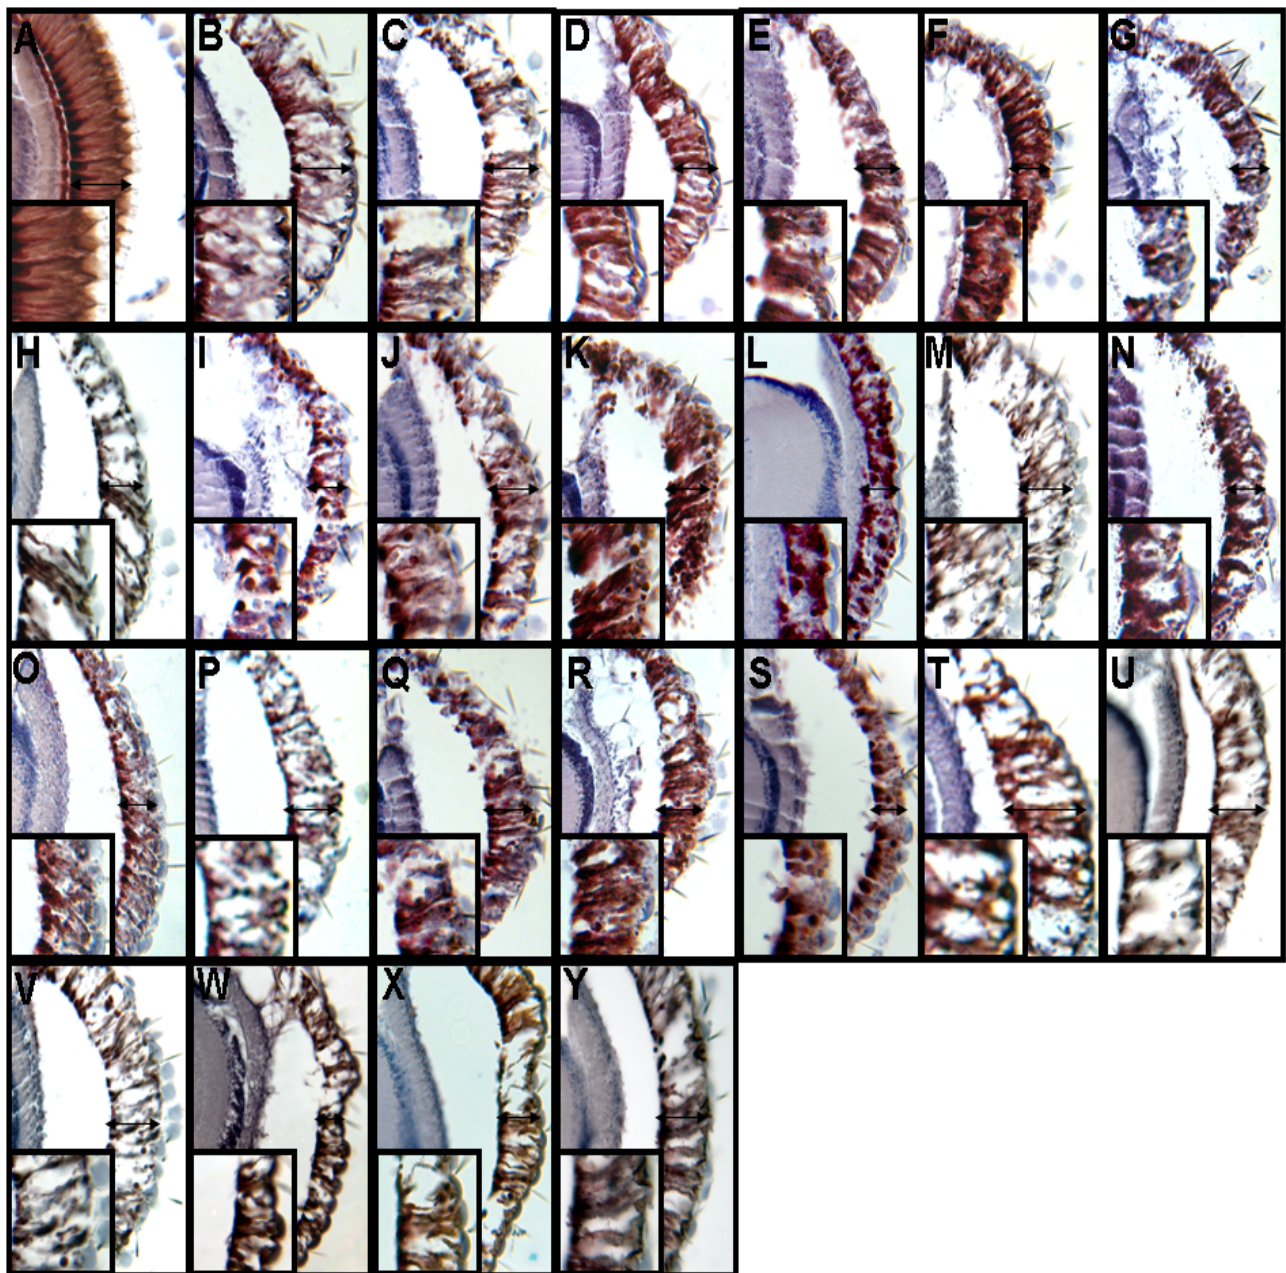

Supplement: pgen.0030082.sg004.pdf [file pgen.0030082.sg004.pdf]
